# Supplementary material for: Tomato Brown Rugose Fruit Virus: Seed Transmission Rate and Efficacy of Different Seed Disinfection Treatments
Source: PubMed Central journal article supplement (PMC7699967; doi:10.3390/plants9111615), 2020-11-20
Supplement: plants-09-01615-s001.pdf [file plants-09-01615-s001.pdf]

**Table S1** – Ct values obtained by Real Time RT-PCR after different thermal and chemical disinfection treatments on ToBRFV-infected seeds.

| Sample ID | Ct values |       |       |       |       |       |      |      |
|-----------|-----------|-------|-------|-------|-------|-------|------|------|
|           | ST-80     | ST-75 | ST-70 | ST-65 | ST-P  | ST-H  | ST-A | ST-S |
| 1         | -         | 20.85 | 24.76 | 24.12 | -     | 25.93 | N.A. | -    |
| 2         | -         | 23.54 | 24.92 | 27.01 | -     | 27.27 | N.A. | -    |
| 3         | 26.55     | 22.58 | 25.08 | 24.49 | -     | 26.24 | N.A. | -    |
| 4         | 27.68     | 25.05 | 24.77 | 23.62 | 27.68 | 26.34 | N.A. | -    |
| 5         | 26.05     | 24.84 | 25.56 | 27.98 | -     | 25.63 | N.A. | -    |
| 6         | 26.24     | 20.57 | 24.96 | 24.50 | -     | 25.97 | N.A. | -    |
| 7         | -         | -     | 24.99 | 26.02 | -     | 26.80 | N.A. | -    |
| 8         | -         | 20.71 | 25.44 | 25.05 | -     | 26.54 | N.A. | -    |
| 9         | -         | 23.79 | 25.05 | 23.54 | -     | 25.95 | N.A. | -    |
| 10        | 26.05     | 25.20 | 25.57 | 26.88 | -     | 25.44 | N.A. | -    |
| 11        | 27.14     | -     | 25.40 | 26.66 | -     | 26.37 | N.A. | -    |
| 12        | -         | 24.26 | 24.95 | 23.60 | -     | 25.19 | N.A. | -    |
| 13        | 27.03     | 20.67 | 26.24 | 26.94 | -     | 25.83 | N.A. | -    |
| 14        | 27.06     | 21.41 | 24.99 | 23.87 | -     | 26.55 | N.A. | -    |
| 15        | -         | -     | 26.17 | 24.37 | -     | 27.16 | N.A. | -    |
| 16        | 26.71     | -     | 24.63 | 25.35 | -     | 25.02 | N.A. | -    |
| 17        | 26.12     | -     | 24.65 | 26.51 | -     | 24.94 | N.A. | -    |
| 18        | 26.56     | 23.84 | 24.88 | 25.04 | -     | 27.07 | N.A. | -    |
| 19        | 27.22     | 23.28 | 26.19 | 27.06 | -     | 26.14 | N.A. | -    |
| 20        | 27.32     | 20.97 | 26.20 | 24.77 | -     | 25.25 | N.A. | -    |
| 21        | 27.22     | 20.60 | 24.73 | 26.67 | -     | 27.16 | N.A. | -    |
| 22        | -         | 22.10 | 24.85 | 28.24 | -     | 26.65 | N.A. | -    |
| 23        | 26.72     | 25.15 | 24.82 | 25.88 | -     | 27.09 | N.A. | -    |
| 24        | -         | 23.23 | 25.35 | 25.11 | -     | 26.34 | N.A. | -    |
| 25        | 26.12     | 20.31 | 26.18 | 26.79 | 25.83 | 25.70 | N.A. | -    |
| 26        | 25.85     | -     | 25.61 | 28.23 | -     | 25.49 | N.A. | -    |
| 27        | 27.51     | 20.07 | 24.91 | 26.79 | -     | 25.41 | N.A. | -    |
| 28        | 26.42     | 23.46 | 24.77 | 26.98 | -     | 25.96 | N.A. | -    |
| 29        | 25.85     | 23.86 | 25.31 | 26.41 | -     | 26.34 | N.A. | -    |
| 30        | 25.89     | -     | 25.84 | 23.45 | -     | 25.22 | N.A. | -    |
| 31        | -         | 24.96 | 24.55 | 26.54 | -     | 26.72 | N.A. | -    |
| 32        | 27.14     | -     | 25.19 | 23.81 | -     | 25.37 | N.A. | -    |
| 33        | -         | -     | 24.59 | 25.90 | -     | 27.22 | N.A. | -    |
| 34        | -         | -     | 26.22 | 27.89 | -     | 26.51 | N.A. | -    |
| 35        | -         | 21.09 | 26.22 | 25.90 | -     | 27.30 | N.A. | -    |
| 36        | 27.46     | 21.93 | 25.40 | 27.75 | -     | 26.57 | N.A. | -    |
| 37        | 26.48     | 20.10 | 25.38 | 23.71 | -     | 27.06 | N.A. | -    |
| 38        | 27.27     | -     | 26.45 | 26.69 | -     | 25.20 | N.A. | -    |
| 39        | 27.48     | 22.83 | 25.53 | 28.11 | -     | 25.65 | N.A. | -    |
| 40        | 27.11     | 25.02 | 26.25 | 23.56 | -     | 26.80 | N.A. | -    |
| 41        | -         | 20.90 | 25.04 | 24.90 | -     | 25.27 | N.A. | -    |
| 42        | 25.91     | 23.05 | 25.47 | 27.92 | -     | 26.70 | N.A. | -    |
| 43        | 26.75     | 20.66 | 25.97 | 24.60 | -     | 27.12 | N.A. | -    |
| 44        | 26.60     | 21.88 | 25.47 | 25.55 | -     | 25.51 | N.A. | -    |
| 45        | 26.82     | 25.57 | 24.98 | 24.54 | -     | 25.35 | N.A. | -    |
| 46        | 25.98     | 23.18 | 24.87 | 28.26 | -     | 25.53 | N.A. | -    |
| 47        | 26.34     | 24.89 | 24.72 | 26.34 | -     | 26.63 | N.A. | -    |
| 48        | 27.64     | 22.89 | 25.95 | 25.26 | -     | 26.88 | N.A. | -    |
| 49        | -         | 24.63 | 25.16 | 25.43 | -     | 26.14 | N.A. | -    |
| 50        | 27.17     | -     | 25.51 | 27.99 | 26.80 | 26.35 | N.A. | -    |
| 51        | 27.04     | 20.37 | 26.26 | 26.99 | -     | 26.43 | N.A. | -    |
| 52        | -         | 25.69 | 24.87 | 26.63 | -     | 25.70 | N.A. | -    |
| 53        | -         | 21.84 | 25.83 | 27.86 | -     | 27.30 | N.A. | -    |

|     |       |       |       |       |   |       |      |   |
|-----|-------|-------|-------|-------|---|-------|------|---|
| 54  | 25.83 | 25.18 | 26.01 | 23.94 | - | 25.92 | N.A. | - |
| 55  | 27.08 | -     | 25.25 | 25.20 | - | 25.10 | N.A. | - |
| 56  | 26.53 | 21.15 | 25.11 | 24.54 | - | 26.47 | N.A. | - |
| 57  | 26.13 | 24.49 | 25.00 | 25.82 | - | 26.06 | N.A. | - |
| 58  | -     | 22.57 | 24.68 | 28.38 | - | 25.52 | N.A. | - |
| 59  | 26.92 | 20.16 | 25.38 | 28.05 | - | 26.58 | N.A. | - |
| 60  | -     | 24.94 | 25.63 | 27.17 | - | 25.52 | N.A. | - |
| 61  | -     | 24.31 | 25.40 | 27.52 | - | 26.17 | N.A. | - |
| 62  | -     | -     | 25.95 | 26.27 | - | 26.52 | N.A. | - |
| 63  | -     | 25.65 | 24.88 | 24.47 | - | 27.02 | N.A. | - |
| 64  | 27.30 | 20.64 | 25.25 | 23.79 | - | 25.44 | N.A. | - |
| 65  | 26.41 | 25.83 | 26.38 | 25.35 | - | 27.07 | N.A. | - |
| 66  | -     | -     | 24.96 | 23.43 | - | 26.58 | N.A. | - |
| 67  | -     | 22.35 | 25.71 | 26.55 | - | 25.05 | N.A. | - |
| 68  | -     | 20.75 | 25.56 | 26.68 | - | 27.08 | N.A. | - |
| 69  | 25.88 | 25.65 | 25.78 | 23.70 | - | 25.49 | N.A. | - |
| 70  | -     | 21.15 | 26.23 | 25.35 | - | 25.80 | N.A. | - |
| 71  | -     | 23.64 | 26.13 | 24.80 | - | 25.04 | N.A. | - |
| 72  | 26.24 | 21.92 | 26.40 | 27.38 | - | 26.55 | N.A. | - |
| 73  | 27.13 | 22.66 | 24.67 | 25.51 | - | 25.52 | N.A. | - |
| 74  | -     | 24.12 | 25.52 | 28.35 | - | 26.01 | N.A. | - |
| 75  | 26.71 | 20.12 | 26.04 | 25.36 | - | 25.30 | N.A. | - |
| 76  | 27.54 | 24.84 | 25.06 | 24.32 | - | 27.08 | N.A. | - |
| 77  | -     | -     | 25.09 | 26.26 | - | 26.80 | N.A. | - |
| 78  | 26.92 | -     | 25.54 | 25.22 | - | 25.79 | N.A. | - |
| 79  | 26.61 | 20.54 | 26.16 | 26.64 | - | 26.20 | N.A. | - |
| 80  | 27.12 | 21.52 | 24.82 | 24.51 | - | 26.28 | N.A. | - |
| 81  | 26.95 | 22.19 | 25.55 | 26.50 | - | 24.99 | N.A. | - |
| 82  | 27.06 | 22.83 | 25.33 | 27.36 | - | 25.25 | N.A. | - |
| 83  | -     | 23.42 | 24.98 | 27.83 | - | 26.07 | N.A. | - |
| 84  | 26.19 | -     | 24.59 | 24.27 | - | 27.23 | N.A. | - |
| 85  | -     | 22.31 | 24.99 | 23.59 | - | 26.61 | N.A. | - |
| 86  | -     | 22.86 | 25.88 | 27.08 | - | 26.88 | N.A. | - |
| 87  | -     | 23.49 | 24.65 | 24.17 | - | 26.89 | N.A. | - |
| 88  | -     | 24.83 | 26.22 | 27.10 | - | 27.11 | N.A. | - |
| 89  | -     | 25.73 | 26.23 | 26.14 | - | 25.10 | N.A. | - |
| 90  | 27.63 | 25.26 | 25.12 | 24.01 | - | 26.67 | N.A. | - |
| 91  | -     | 25.42 | 24.69 | 27.78 | - | 26.52 | N.A. | - |
| 92  | -     | 25.97 | 25.49 | 23.91 | - | 27.31 | N.A. | - |
| 93  | -     | 23.59 | 26.13 | 26.71 | - | 27.28 | N.A. | - |
| 94  | -     | 23.85 | 24.75 | 25.94 | - | 26.25 | N.A. | - |
| 95  | 26.84 | 20.64 | 24.54 | 24.59 | - | 27.21 | N.A. | - |
| 96  | 25.98 | 26.04 | 25.38 | 26.35 | - | 26.30 | N.A. | - |
| 97  | -     | 23.68 | 25.71 | 25.84 | - | 26.31 | N.A. | - |
| 98  | 26.32 | 22.47 | 24.65 | 24.11 | - | 26.98 | N.A. | - |
| 99  | 27.50 | -     | 25.48 | 24.49 | - | 25.39 | N.A. | - |
| 100 | 27.15 | -     | 25.42 | 25.52 | - | 26.23 | N.A. | - |

**ST**= seed treated; **80**= 80 °C; **75**= 75 °C; **70**= 70 °C; **65**= 65 °C; **P**=10% trisodium phosphate; **H**= 4% hydrogen peroxide; **A**= 2% hydrochloric acid + 1.5% sodium hypochlorite; **S**= 2.5% sodium hypochlorite solution.
